# Supplementary material
Source: PubMed Central journal article supplement (PMC6421254)
Supplement: 737012_supplementary_material.pdf [file 737012_supplementary_material.pdf]

**Supp. Fig. 1 K<sup>+</sup>-dependent stimulation of glucose consumption in astrocytes from OHS is not mediated by neurons**

Organotypical hippocampal astrocytes expressing the glucose sensor were continuously perfused with HCO<sub>3</sub><sup>-</sup>/CO<sub>2</sub> buffer containing 2 mM glucose and 1 mM lactate in the presence of a cocktail of neuronal pre (TTX, 0,5 μM) and postsynaptic inhibitors (MK-801, 15 μM and DNQX, 30 μM) of . **(A)** Cytochalasin B (Cyto B, 20 μM) was applied in the presence of the inhibitory cocktail to determine the effect of 12 mM K<sup>+</sup> the glucose consumption rate in astrocytes. The trace represent one representative astrocyte. **(B)** Bar graphs summarise the percentage of glycolytic activation stimulation with K<sup>+</sup> in the presence of the neuronal inhibitory cocktail. The number of experiments is represented as n° of cells/ n° slices/ n° animals
