# Supplementary material
Source: PubMed Central journal article supplement (PMC6421254)

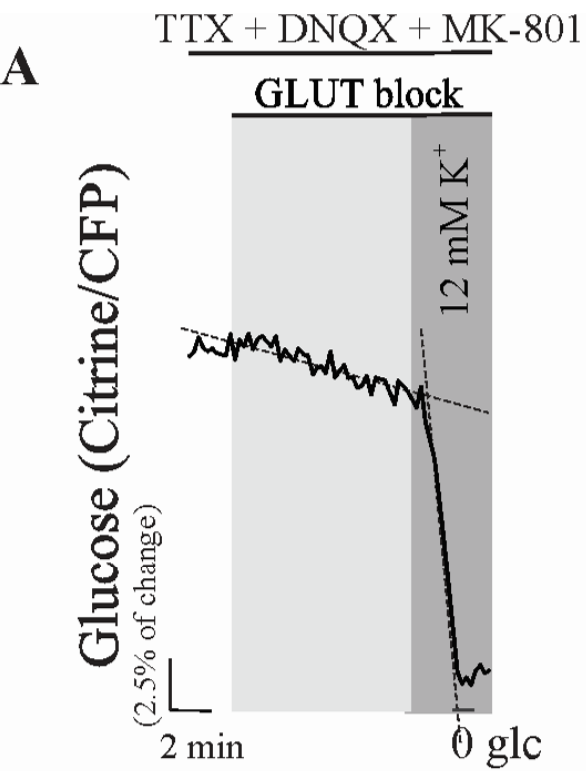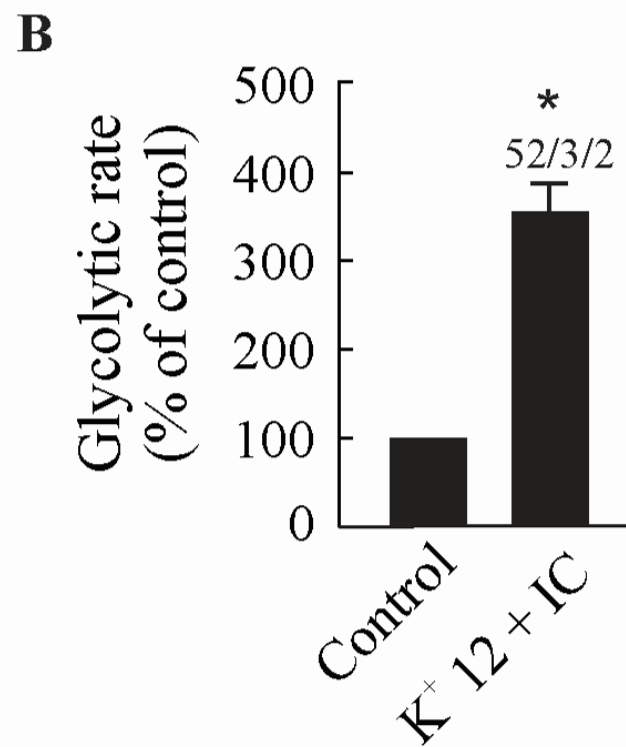

Supp. Fig. 1

Supplement: 737012_supplementary_figure.pdf [file 737012_supplementary_figure.pdf]
